# Supplementary material for: The role of the FliD C-terminal domain in pentamer formation and interaction with FliT
Source: PubMed Central journal article supplement (PMC5493677; doi:10.1038/s41598-017-02664-6), 2017-06-30
Supplement: 41598_2017_2664_MOESM1_ESM.pdf [file 41598_2017_2664_MOESM1_ESM.pdf]

# **The role of the FliD C-terminal domain in pentamer formation and interaction with FliT**

Hee Jung Kim<sup>1,2,\*</sup>, Woongjae Yoo<sup>3,\*</sup>, Kyeong Sik Jin<sup>4</sup>, Sangryeol Ryu<sup>3,5</sup> & Hyung Ho Lee<sup>1,†</sup>

<sup>1</sup>Department of Chemistry, College of Natural Sciences, Seoul National University, Seoul 151-742, Korea

<sup>2</sup>Department of Bio & Nano Chemistry, Kookmin University, Seoul 136-702, Korea

<sup>3</sup>Department of Food and Animal Biotechnology, Department of Agricultural Biotechnology, and Research Institute for Agriculture and Life Sciences, Seoul National University, Seoul 08826, Korea

<sup>4</sup>Pohang Accelerator Laboratory, Pohang University of Science and Technology, 80 Jigokro-127-beongil, Nam-Gu, Pohang, Kyungbuk 37673, Korea

<sup>5</sup>Center for Food and Bioconvergence, Seoul National University, Seoul 08826, Korea

\*These authors contributed equally to this work.

†Corresponding author:

Professor Hyung Ho Lee, Department of Chemistry, College of Natural Sciences, Seoul National University, Seoul 08826, Korea

## Supplementary figures

**A**

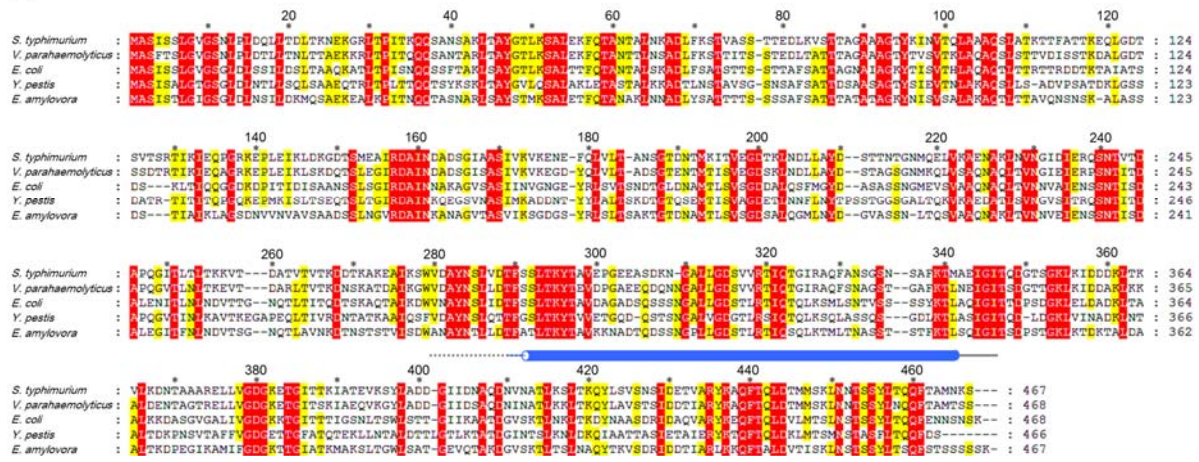

**B**

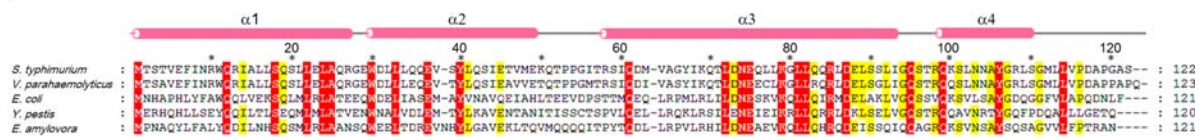

**Figure S1. Sequence alignments of StFliD and StFliT.** (A) Multi-alignment of *S. Typhimurium* FliD (UniProtKB/Swiss-Prot accession number P16328) against FliD from *Vibrio parahaemolyticus* (UniProtKB/Swiss-Prot accession number A0A0M3E723), *E. coli* (UniProtKB/Swiss-Prot accession number P24216), *Yersinia pestis* (UniProtKB/Swiss-Prot accession number Q7CHZ9), and *Erwinia amylovora* (UniProtKB/Swiss-Prot accession number D4HVZ3). Secondary structure elements were assigned by PyMOL (The PyMOL Molecular Graphics System, <http://www.pymol.org>) and every tenth residue is marked by a black star. Strictly (100%) and semi-conserved (above 80%) residues are highlighted in red and yellow, respectively. Cylinders above the sequences denote  $\alpha$ -helices. A dotted line denotes disordered regions. (B) Multi-alignment of *S. Typhimurium* FliT (UniProtKB/Swiss-Prot accession number

P0A1N2) against FliT from *V. parahaemolyticus* (UniProtKB/Swiss-Prot accession number A0A0M3E5B6), *E. coli* (UniProtKB/Swiss-Prot accession number P0ABY2), *Y. pestis* (UniProtKB/Swiss-Prot accession number Q8D0B5), and *E. amylovora* (UniProtKB/Swiss-Prot accession number D4HVZ5), respectively.

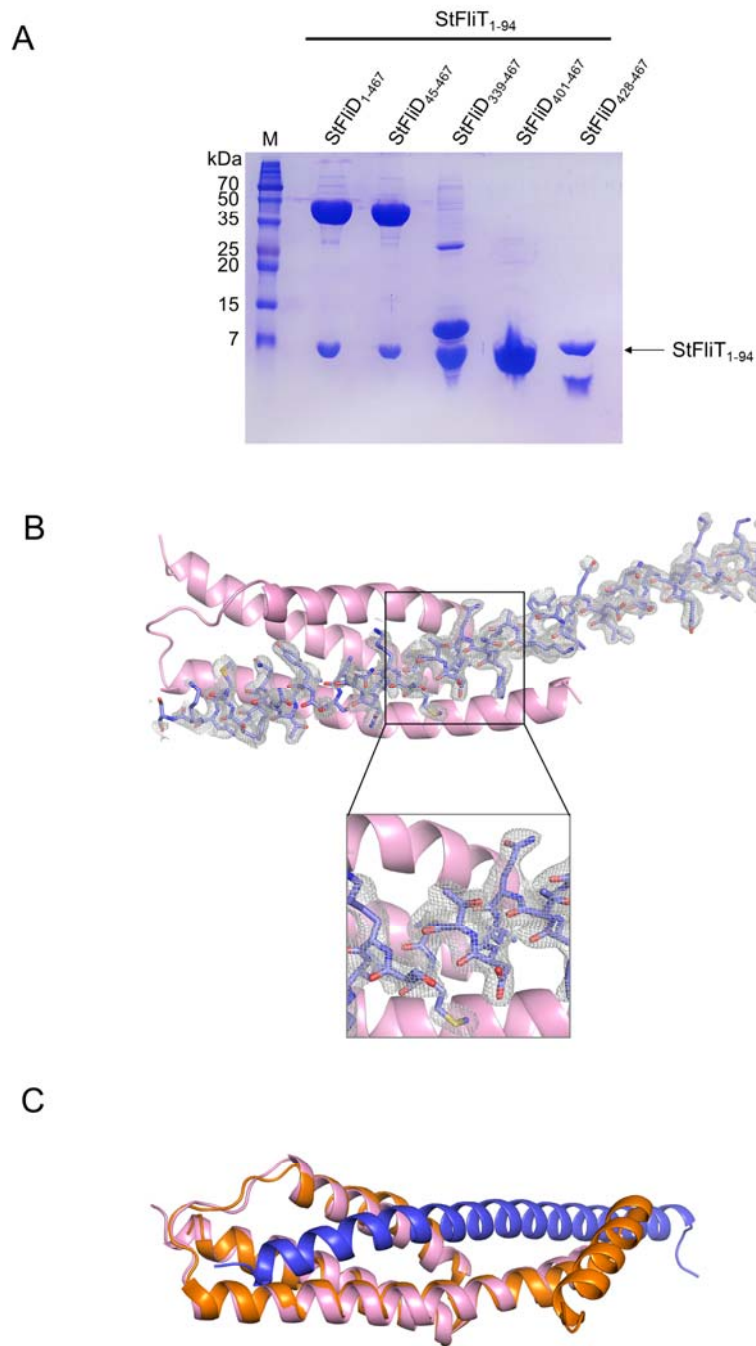

**Figure S2. Co-purification of various StFliD-StFliT complexes and omit map of the StFliD<sub>401-467</sub>-StFliT<sub>1-94</sub> complex.** (A) SDS-PAGE of co-purified StFliD<sub>1-467</sub>-StFliT<sub>1-94</sub>, StFliD<sub>45-467</sub>-StFliT<sub>1-94</sub>, StFliD<sub>339-467</sub>-StFliT<sub>1-94</sub>, StFliD<sub>401-467</sub>-StFliT<sub>1-94</sub>, and StFliD<sub>428-467</sub>-StFliT<sub>1-94</sub> complexes. SDS-PAGE gels were visualized using Coomassie blue. (B) A composite simulated

annealed omit map (1.5 sigma) for StFliD<sub>401-467</sub> of the StFliD<sub>401-467</sub>-StFliT<sub>1-94</sub> complex. (C)  
Superposition of crystal structures of StFliD-StFliT complex (PDB code 5GNA, pink and light blue, respectively,) and StFliT alone (orange, PDB code 3A7M).

**A**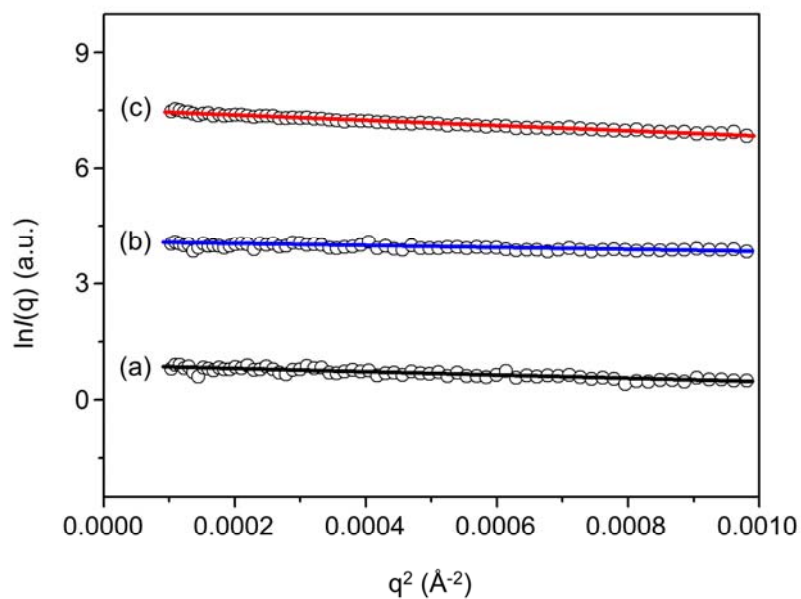**B**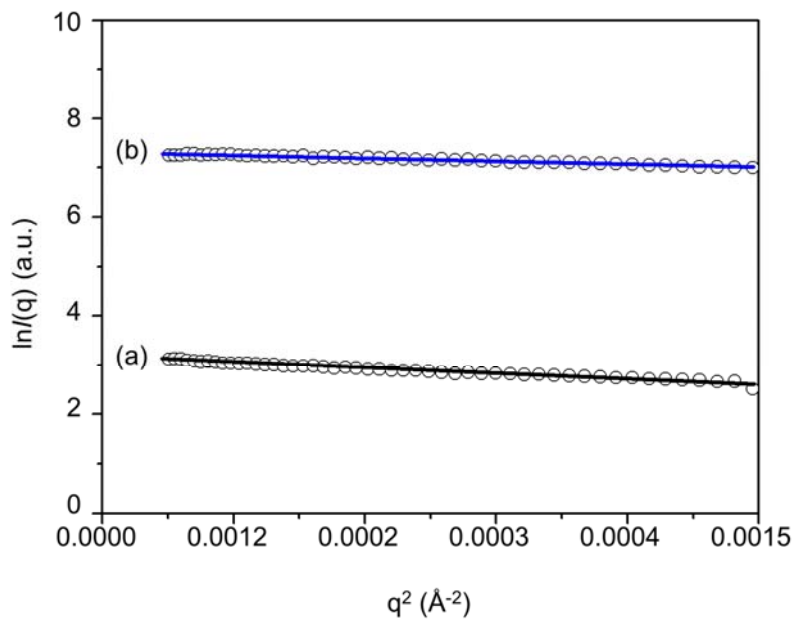

**Figure S3. Guinier plots of X-ray scattering profiles of StFliD-StFliT proteins in aqueous solution. (A)** The StFliD<sub>339-467</sub>-StFliT<sub>1-94</sub> complex, StFliD<sub>401-467</sub>-StFliT<sub>1-94</sub> complex, and StFliD<sub>1-</sub>

<sup>467</sup> L443R mutant are shown in (a), (b), and (c), respectively. The straight lines were obtained from the linear regression of the scattering data in the  $q^2$  region. For clarity, each plot is shifted along the  $\ln I(q)$  axis. **(B)** The StFlID<sub>45-467</sub>-StFliT<sub>1-94</sub> complex and StFlID<sub>1-300</sub> are shown in (a) and (b), respectively. Straight lines were obtained from linear regression of the scattering data in the  $q^2$  region. For clarity, each plot is shifted along the  $\ln I(q)$  axis.

A

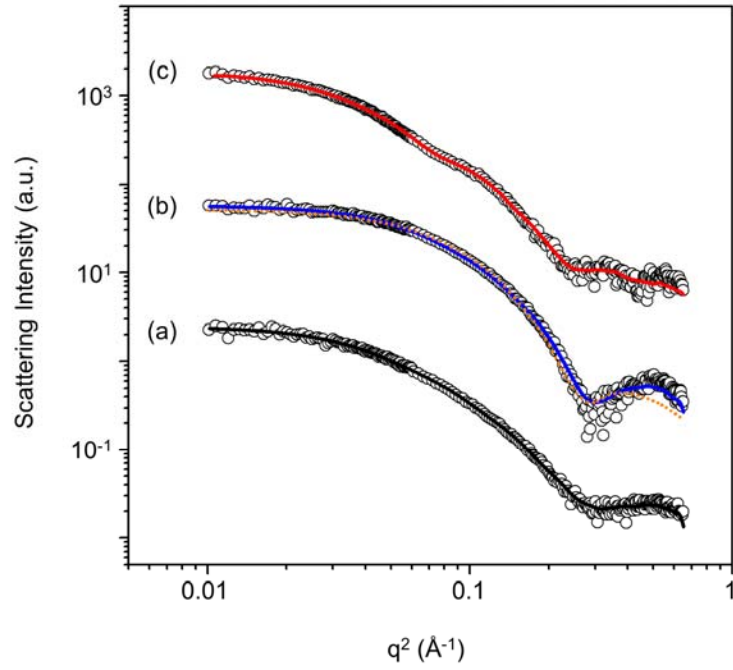

B

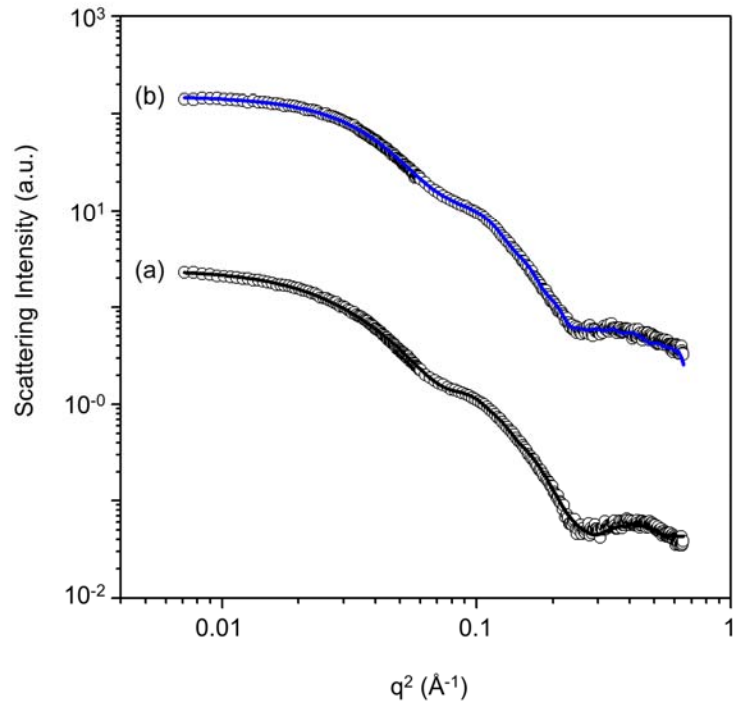

**Figure S4. X-ray scattering profiles of StFliD-StFliT proteins in solution.** (A) The StFliD<sub>339-467</sub>-StFliT<sub>1-94</sub> complex, StFliD<sub>401-467</sub>-StFliT<sub>1-94</sub> complex, and StFliD<sub>1-467</sub> L443R mutant are shown



in (a), (b), and (c), respectively. The open symbols indicate experimental data and the solid lines indicate X-ray scattering profiles obtained from the dummy atom models with the lowest  $\chi^2 = 0.021\text{--}0.025$  values obtained using the program DAMMIF. The dashed line is the theoretical SAXS curve calculated from the crystal structure of StFliD<sub>412-467</sub>-StFliT<sub>1-94</sub> protein using the program CRY SOL ( $\chi^2 = 0.130$ ). For clarity, each plot is shifted along the  $\log I(q)$  axis. **(B)** The StFliD<sub>45-467</sub>-StFliT<sub>1-94</sub> complex and the StFliD<sub>1-300</sub> are shown in (a) and (b), respectively. The open symbols indicate experimental data and the solid lines indicate X-ray scattering profiles obtained from the dummy atom models with the lowest  $\chi^2 = 0.052\text{--}0.160$  values determined using the program DAMMIF. For clarity, each plot is shifted along the  $\log I(q)$  axis.

A

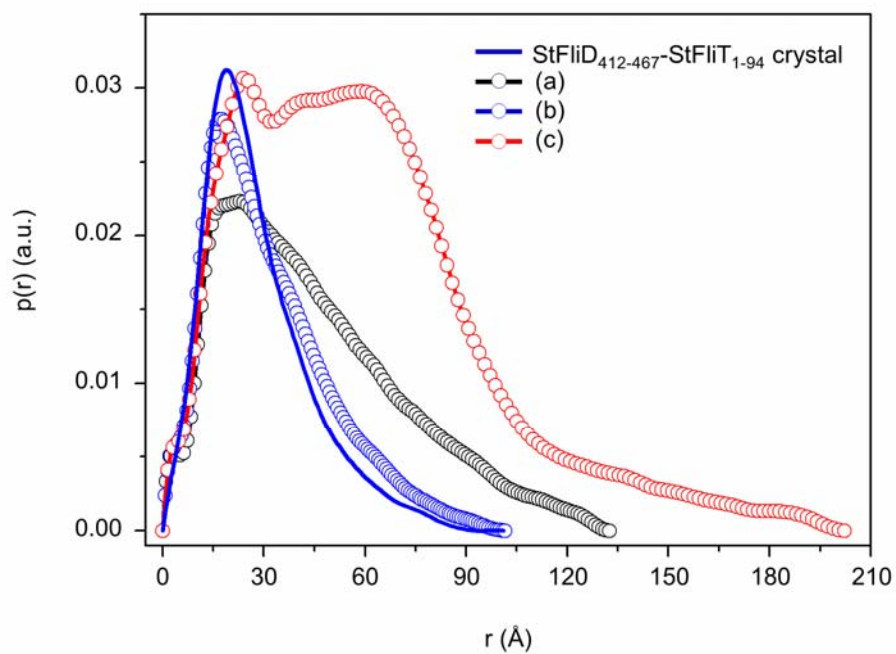

B

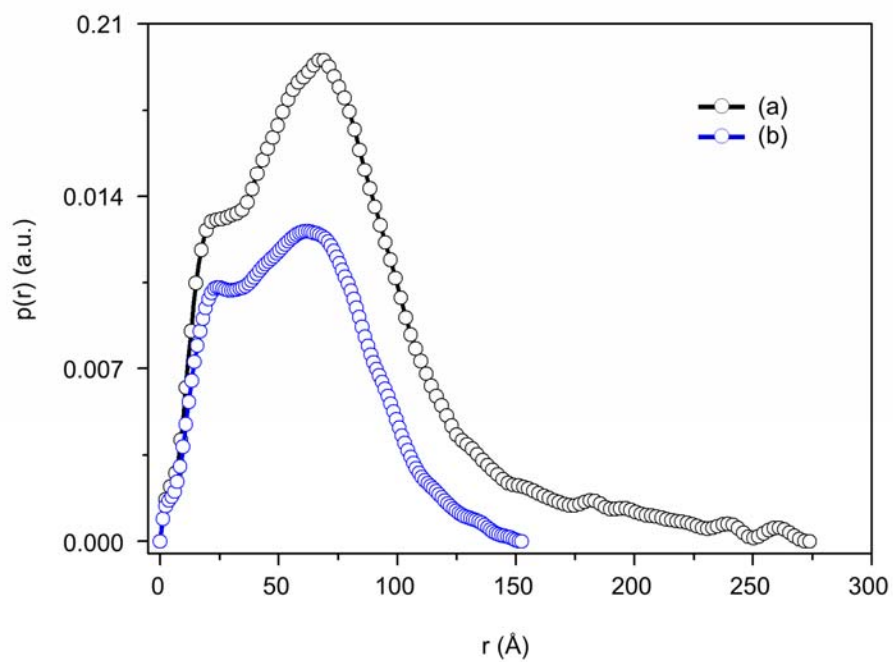

**Figure S5. Pair distance distribution  $p(r)$  functions of StFliD-StFliT proteins in aqueous solution based on analysis of experimental SAXS data using the program GNOM. (A) The**

StFliD<sub>339-467</sub>-StFliT<sub>1-94</sub> complex, StFliD<sub>401-467</sub>-StFliT<sub>1-94</sub> complex, and StFliD<sub>1-467</sub> L443R mutant are shown in (a), (b), and (c), respectively. The areas under the curves were normalized to the molecular weights. **(B)** The StFliD<sub>45-467</sub>-StFliT<sub>1-94</sub> complex and StFliD<sub>1-300</sub> are shown in (a) and (b), respectively. The areas under the curves were normalized to the molecular weights.

A

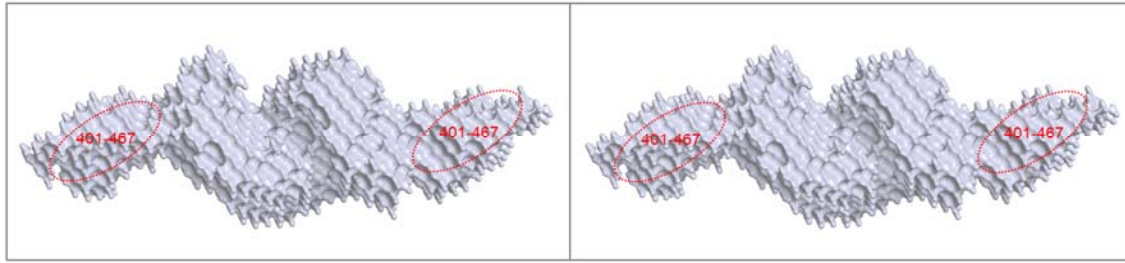

StFlID<sub>45-467</sub>-StFlIT<sub>1-94</sub>

B

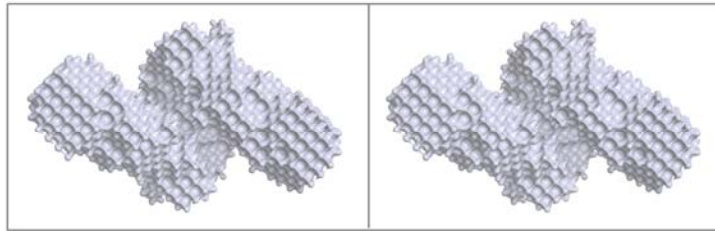

StFlID<sub>1-300</sub>

**Figure S6. SAXS solution structures of the StFlID<sub>45-467</sub>-StFlIT<sub>1-94</sub> complex and StFlID<sub>1-300</sub>.**

(A, B) Stereo reconstructed structural models of the StFlID<sub>45-467</sub>-StFlIT<sub>1-94</sub> complex and StFlID<sub>1-300</sub> were generated using the *ab initio* shape determination program DAMMIF. Surface renderings of the structural models were generated using the program PyMOL. Dotted lines indicate the positions of each domain.

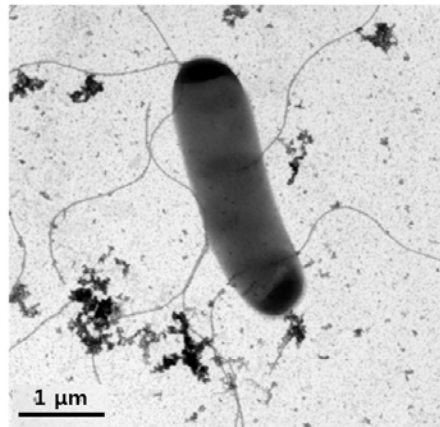

WT

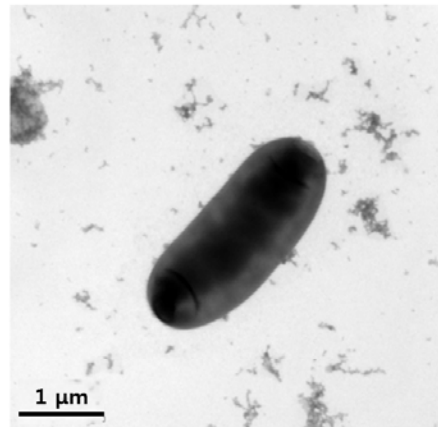

$\Delta fliD$

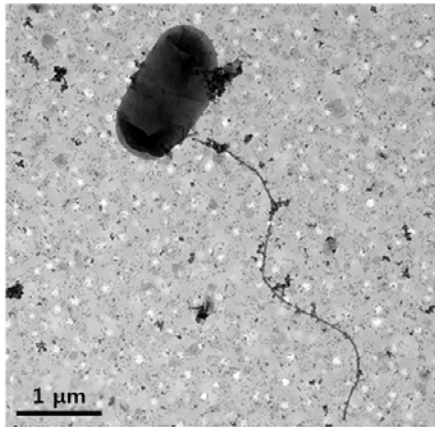

$\Delta fliD$  + FliD

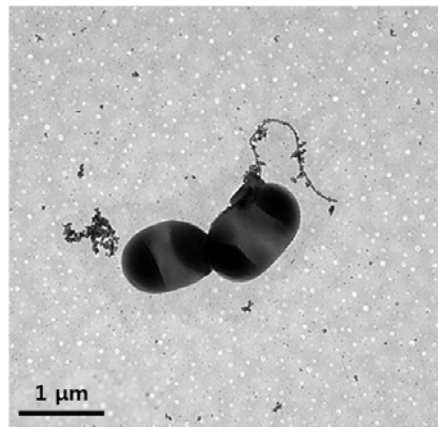

$\Delta fliD$  + FliD (L443R)

**Figure S7. Flagellar regeneration activity of purified StFliD<sub>1-467</sub> WT and StFliD<sub>1-467</sub> L443R proteins.** Cells grown in LB broth were stained negatively with phosphotungstic acid and observed by TEM. Purified StFliD<sub>1-467</sub> WT and StFliD<sub>1-467</sub> L443R proteins were added to the culture of the  $\Delta fliD$  mutant strain to facilitate flagellar regeneration. Micrographs were acquired at a magnification of  $\times 8000$ . Bar, 1  $\mu\text{M}$ .

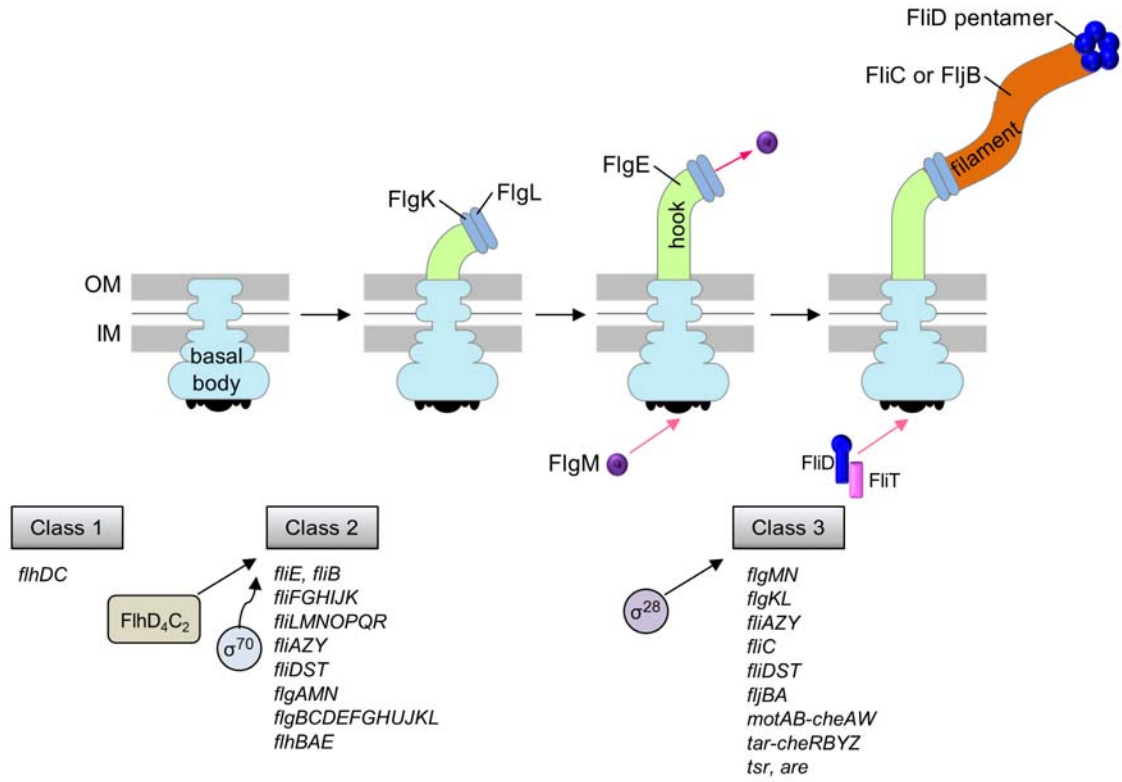

Figure S8. Schematic diagram of flagellar transcriptional hierarchy.

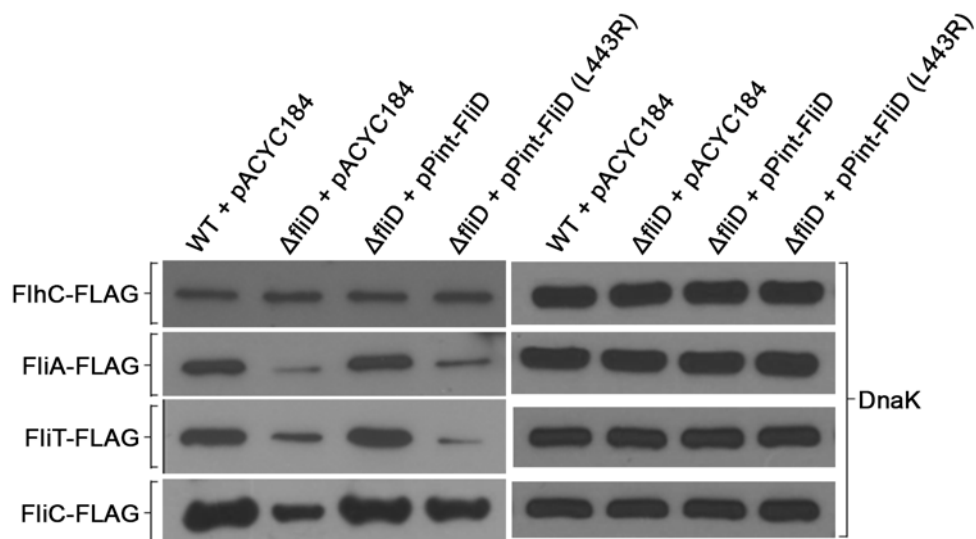

**Figure S9. Western blot analysis using  $\Delta fliD$  mutant strain transformed with pACYC184 vector expressing either StFliD WT or L443R mutant.** Comparison of FLAG-tagged FlhC, FliA, FliT, and FliC protein levels between wild-type and  $\Delta fliD$  mutant strain with or without pPint-FliD or pPint-FliD (L443R) (a pACYC184 derivative expressing *fliD* or *fliD* (L443R), respectively) under its intrinsic promoter. Protein samples were isolated from each culture grown in LB medium at mid-log phase and subjected to western blot analysis. The expression the FlhC, FliA, FliT, and FliC proteins was assessed using an anti-FLAG antibody. In all experiments, equivalent amounts of total protein were loaded into each lane for SDS-PAGE and DnaK levels were measured in parallel to verify equivalent total protein loading between lanes.

## Supplementary tables

**Table S1. Statistics for data collection and refinement.**

| Data set                                                             | StFliD <sub>401-467</sub> -StFliT <sub>1-94</sub> complex |
|----------------------------------------------------------------------|-----------------------------------------------------------|
| <b>A. Data collection statistics</b>                                 |                                                           |
| X-ray source                                                         | PLS BL-5C                                                 |
| X-ray wavelength (Å)                                                 | 0.97960                                                   |
| Space group                                                          | <i>P</i> 4 <sub>3</sub> 22                                |
| <i>a</i> , <i>b</i> , <i>c</i> (Å)                                   | 50.4, 50.4, 184.6                                         |
| Resolution range (Å)                                                 | 50-2.3                                                    |
| Total / unique reflections                                           | 307,692 / 11,357                                          |
| Completeness (%)                                                     | 100.0 (100.0) <sup>a</sup>                                |
| Average <i>I</i> / $\sigma$ ( <i>I</i> )                             | 87.6 (17.5) <sup>a</sup>                                  |
| <i>R</i> <sub>merge</sub> <sup>b</sup> (%)                           | 8.4 (40.9) <sup>a</sup>                                   |
| <b>B. Model refinement statistics</b>                                |                                                           |
| Resolution range (Å)                                                 | 30-2.3                                                    |
| <i>R</i> <sub>work</sub> / <i>R</i> <sub>free</sub> <sup>c</sup> (%) | 21.4 / 23.0                                               |
| Number / average <i>B</i> -factor (Å <sup>2</sup> )                  |                                                           |
| Protein nonhydrogen atoms                                            | 1208 / 51.2                                               |
| Water oxygen atoms                                                   | 193 / 60.6                                                |
| R.m.s. deviations from ideal geometry                                |                                                           |
| Bond lengths (Å)                                                     | 0.006                                                     |
| Bond angles (°)                                                      | 0.922                                                     |
| Protein-geometry analysis                                            |                                                           |
| Ramachandran favored (%)                                             | 100.0 (148/148)                                           |
| Ramachandran allowed (%)                                             | 0.0 (0/148)                                               |
| Ramachandran outliers (%)                                            | 0.0 (0/148)                                               |

### Footnotes for table S1

<sup>a</sup> Values in parentheses refer to the highest resolution shell (2.34-2.30 Å).



<sup>b</sup>  $R_{\text{merge}} = \sum_{\text{hkl}} \sum_i |I_i(\text{hkl}) - \langle I(\text{hkl}) \rangle| / \sum_{\text{hkl}} \sum_i I_i(\text{hkl})$ , where  $I(\text{hkl})$  is the intensity of reflection  $\text{hkl}$ ,  $\sum_{\text{hkl}}$  is the sum over all reflections, and  $\sum_i$  is the sum over  $i$  measurements of reflection  $\text{hkl}$ .

<sup>c</sup>  $R = \sum_{\text{hkl}} (|F_{\text{obs}}| - |F_{\text{calc}}|) / \sum_{\text{hkl}} |F_{\text{obs}}|$ , where  $R_{\text{free}}$  was calculated for a randomly chosen 10% of reflections, which were not used for structure refinement and  $R_{\text{work}}$  was calculated for the remaining.

**Table S2. Structural parameters obtained from the SAXS data of the StFliD<sub>339-467</sub>-StFliT<sub>1-94</sub> complex, the StFliD<sub>401-467</sub>-StFliT<sub>1-94</sub> complex, and StFliD<sub>1-467</sub> L443R mutant in solution.**

| Sample                                                       | $R_{g,G}$ <sup>a</sup> (Å) | $R_{g,p(r)}$ <sup>b</sup> (Å) | $D_{max}$ <sup>c</sup> (Å) | $MM_{calculated}$ <sup>d</sup><br>(kDa) | $MM_{SAXS}$ <sup>e</sup><br>(kDa) | $V_p$ <sup>f</sup> (Å <sup>3</sup> ) |
|--------------------------------------------------------------|----------------------------|-------------------------------|----------------------------|-----------------------------------------|-----------------------------------|--------------------------------------|
| Crystal structure <sup>g</sup>                               | 21.59 ± 0.07               | 22.69 ± 0.01                  | 98                         | (18.7)                                  | -                                 | 24060 <sup>h</sup>                   |
| StFliD <sub>339-467</sub> /StFliT <sub>1-94</sub><br>complex | 34.24 ± 1.51               | 36.75 ± 2.11                  | 133                        | 25.3                                    | 28.4                              | 44607                                |
| StFliD <sub>401-467</sub> -StFliT <sub>1-94</sub><br>complex | 24.10 ± 0.78               | 25.64 ± 1.08                  | 102                        | 18.7                                    | 18.4                              | 26009                                |
| StFliD <sub>1-467</sub> L443R                                | 46.29 ± 2.02               | 49.35 ± 3.68                  | 203                        | 49.8                                    | 50.0                              | 101264                               |

**Footnotes for table S2**

<sup>a</sup> $R_{g,G}$  (radius of gyration) was obtained from the scattering data by the Guinier analysis.

<sup>b</sup> $R_{g,p(r)}$  (radius of gyration) was obtained from the  $p(r)$  function by the program GNOM.

<sup>c</sup> $D_{max}$  (maximum dimension) was obtained from the  $p(r)$  function by the program GNOM.

<sup>d</sup> $MM_{calculated}$  (molecular mass) was obtained from the amino acid sequence of protein.

<sup>e</sup> $MM_{SAXS}$  (molecular mass) was estimated from a BSA standard protein.

<sup>f</sup> $V_p$  (Porod volume) was determined from the program PRIMUS.

<sup>g</sup>Crystal structure of StFliD<sub>401-467</sub>-StFliT<sub>1-94</sub> complex.

<sup>h</sup>Envelope volume was determined from the atomic crystal structure by the program CRY SOL.

**Table S3. Structural parameters obtained from the SAXS data of the StFliD<sub>45-467</sub>-StFliT<sub>1-94</sub> complex and StFliD<sub>1-300</sub> in solution.**

| Sample                                                      | $R_{g,G}$ <sup>a</sup> (Å) | $R_{g,p(r)}$ <sup>b</sup> (Å) | $D_{max}$ <sup>c</sup> (Å) | $MM_{calculated}$ <sup>d</sup><br>(kDa) | $MM_{SAXS}$ <sup>e</sup><br>(kDa) | $V_p$ <sup>f</sup><br>(Å <sup>3</sup> ) |
|-------------------------------------------------------------|----------------------------|-------------------------------|----------------------------|-----------------------------------------|-----------------------------------|-----------------------------------------|
| StFliD <sub>45-467</sub> /StFliT <sub>1-94</sub><br>complex | 55.70 ± 0.99               | 61.96 ± 2.50                  | 275                        | 56.4                                    | 112.5                             | 211931                                  |
| StFliD <sub>1-300</sub>                                     | 44.26 ± 0.72               | 45.86 ± 0.50                  | 153                        | 31.9                                    | 62.1                              | 125360                                  |

**Footnotes for table S3**

<sup>a</sup> $R_{g,G}$  (radius of gyration) was obtained from the scattering data by the Guinier analysis.

<sup>b</sup> $R_{g,p(r)}$  (radius of gyration) was obtained from the  $p(r)$  function by the program GNOM.

<sup>c</sup> $D_{max}$  (maximum dimension) was obtained from the  $p(r)$  function by the program GNOM.

<sup>d</sup> $MM_{calculated}$  (molecular mass) was obtained from the amino acid sequence of protein.

<sup>e</sup> $MM_{SAXS}$  (molecular mass) was estimated from a BSA standard protein.

<sup>f</sup> $V_p$  (Porod volume) was determined from the program PRIMUS.

<sup>g</sup>Envelope volume was determined from the atomic crystal structure by the program CRY SOL.

**Table S4. Bacterial strains and plasmids used in this study.**

| Strains                                               | Description                                                                                                                                               | Reference or source |
|-------------------------------------------------------|-----------------------------------------------------------------------------------------------------------------------------------------------------------|---------------------|
| <b><i>Salmonella enterica</i> serovar Typhimurium</b> |                                                                                                                                                           |                     |
| SL1344                                                | Wild type, Sm <sup>R</sup>                                                                                                                                | (1)                 |
| SR7031                                                | $\Delta fliD$                                                                                                                                             | This study          |
| SR7032                                                | FliC-FLAG                                                                                                                                                 | This study          |
| SR7033                                                | FliC-FLAG, $\Delta fliD$                                                                                                                                  | This study          |
| SR7034                                                | FliA-FLAG                                                                                                                                                 | This study          |
| SR7035                                                | FliA-FLAG, $\Delta fliD$                                                                                                                                  | This study          |
| SR7036                                                | FliT-FLAG                                                                                                                                                 | This study          |
| SR7037                                                | FliT-FLAG, $\Delta fliD$                                                                                                                                  | This study          |
| SR7038                                                | FliC-FLAG                                                                                                                                                 | This study          |
| SR7039                                                | FliC-FLAG, $\Delta fliD$                                                                                                                                  | This study          |
| <b><i>E. coli</i></b>                                 |                                                                                                                                                           |                     |
| DH5 $\alpha$                                          | <i>gyrA96 recA1 relA1 endA1 thi-1 hsdR17<br/>glnV44 deoR <math>\Delta(lacZYA-argF)</math>U169<br/>[<math>\Phi</math>80d <math>\Delta(lacZ)</math>M15]</i> | (2)                 |
| <b>Plasmids</b>                                       |                                                                                                                                                           |                     |
| pKD46                                                 | Ap <sup>R</sup> P <sub>BAD</sub> -gam-beta-exo oriR101 repA101 <sup>ts</sup>                                                                              | (3)                 |
| pKD13                                                 | Ap <sup>R</sup> FRT Km <sup>R</sup> FRT PS1 PS4 oriR6K $\gamma$                                                                                           | (3)                 |
| pCP20                                                 | Ap <sup>R</sup> Cm <sup>R</sup> cI857 $\lambda$ P <sub>R</sub> flp oripSC101 <sup>ts</sup>                                                                | (3)                 |
| pACYC184                                              | Tet <sup>R</sup> Cm <sup>R</sup> p15A ori                                                                                                                 | (4)                 |
| pUHE21-2 <i>lacI</i> <sup>q</sup>                     | rep <sub>pMB1</sub> Ap <sup>R</sup> <i>lacI</i> <sup>q</sup>                                                                                              | (5)                 |
| pT25- <i>fliD</i>                                     | pKT25- <i>fliD</i>                                                                                                                                        | This study          |
| pT25- <i>fliD</i> (L443R)                             | pKT25- <i>fliD</i> (L443R)                                                                                                                                | This study          |
| pT18- <i>fliT</i>                                     | pUT18C- <i>fliT</i>                                                                                                                                       | This study          |
| pPint-FliD                                            | pACYC184- <i>fliD</i>                                                                                                                                     | This study          |
| pPint-FliD (L443R)                                    | pACYC184- <i>fliD</i> (L443R)                                                                                                                             | This study          |
| pPlac-FliD                                            | pUHE21-2 <i>lacI</i> <sup>q</sup> - <i>fliD</i>                                                                                                           | This study          |
| pPlac-FliT                                            | pUHE21-2 <i>lacI</i> <sup>q</sup> - <i>fliT</i>                                                                                                           | This study          |
| pEGFP-FliD                                            | pET28a-EGFP-FliD                                                                                                                                          | (6)                 |

|                      |                                                            |            |
|----------------------|------------------------------------------------------------|------------|
| pPlac-EGFP-FliD-FLAG | pUHE21-2 <i>lacI</i> <sup>q</sup> -EGFP- <i>fliD</i> -FLAG | This study |
| pPlac-FliD-FLAG      | pUHE21-2 <i>lacI</i> <sup>q</sup> - <i>fliD</i> -FLAG      | This study |

**Table S5. Primers used for the construction of bacterial strains and plasmids.**

| Primers       | Sequences (5' to 3')                                                                                                                  |
|---------------|---------------------------------------------------------------------------------------------------------------------------------------|
| fliD-del-F    | TAC CAA ACA GCA GAG CGC GAA TTC GGC AAA GCT<br>AAC CGC CTG TAG GCT GGA GCT GCT TCG                                                    |
| fliD-del-R    | CAT CAT CAA TCT TCA GTT TGC CGG AAG TCC CAT CCT<br>GGG TAT TCC GGG GAT CCG TCG ACC                                                    |
| flhC-FLAG-F   | TAT TCC ACA ACT GCT GGA TGA ACA GAT CGA ACA GGC<br>TGT TGGC AGC GGC GAC TAC AAA GAC GAT GAC GAC<br>AAG TAA TGT AGG CTG GAG CTG CTT CG |
| flhC-FLAG-R   | TGA CTT ACC GCT GCT GGA GTG TTT GTC CAC ACC GTT<br>TCG GAT TCC GGG GAT CCG TCG ACC                                                    |
| fliA-FLAG-F   | TCA GGC CAT CAA ACG ATT ACG CAC CAA ACT GGG TAA<br>GTT AGGC AGC GGC GAC TAC AAA GAC GAT GAC GAC<br>AAG TAA TGT AGG CTG GAG CTG CTT CG |
| fliA-FLAG-R   | ATA CGT TGT GCG GCA CTT TTC GGG TGC GAT CAT GCG<br>CGA CAT TCC GGG GAT CCG TCG ACC                                                    |
| fliT-FLAG-F   | TTC CGG TAT GTT ACT CGT GCC AGA TGC GCC TGG CGC<br>CTC AGGC AGC GGC GAC TAC AAA GAC GAT GAC GAC<br>AAG TAA TGT AGG CTG GAG CTG CTT CG |
| fliT-FLAG-R   | TCT GGA GTA TGG AAG AAT TTT CAT ACG AGA CGG GAA<br>AAT AAT TCC GGG GAT CCG TCG ACC                                                    |
| fliC-FLAG-F   | GGC GAA CCA GGT TCC GCA AAA CGT CCT CTC TTT ACT<br>GCG TGGC AGC GGC GAC TAC AAA GAC GAT GAC GAC<br>AAG TAA TGT AGG CTG GAG CTG CTT CG |
| fliC-FLAG-R   | CCT TGA TTG TGT ACC ACG TGT CGG TGA ATC AAT CGC<br>CGG AAT TCC GGG GAT CCG TCG ACC                                                    |
| fliD-comple-F | AAA GGA TCC CCC ACG GTT TCT CAC CGT AA                                                                                                |
| fliD-comple-R | AAA GCA TGC ATA AGC TTT GAT ACC GCT CG                                                                                                |
| fliD-L443R-F  | GCC CAG TTT ACC CAA CGG GAT ACC ATG ATG AGT                                                                                           |
| fliD-L443R-R  | ACT CAT CAT GGT ATC CCG TTG GGT AAA CTG GGC                                                                                           |
| fliD-over-F   | AAA GGA TCC ATG GCT TCA ATT TCA TCA TT                                                                                                |
| fliD-over-R   | AAA GTC GAC ATA AGC TTT GAT ACC GCT CG                                                                                                |
| fliT-over-F   | AAA GGA TCC ATG ACC TCA ACC GTG GAG TT                                                                                                |

|                    |                                                                                           |
|--------------------|-------------------------------------------------------------------------------------------|
| fliT-over-R        | AAA GTC GAC ATT TTC ATA CGA GAC GGG AA                                                    |
| fliD(1-467)-F      | GCT ATA TGG ATC CGG AAA ACC TGT ATT TTC AGG<br>GCA TGG CTT CAA TTT CAT CAT TAG GTG        |
| fliD(1-300)-R      | GCT AAT TCT CGA GTC ACT CAA CGG CGG TAT ATT<br>TGG TTA                                    |
| fliD(1-467)-R      | GCT AAT TCT CGA GTC AGG ACT TGT TCA TAG CTG<br>TAA A                                      |
| fliD(45-467)-F     | GCT ATA TGG ATC CGG AAA ACC TGT ATT TTC AGG<br>GCA CCG CCT ATG GCA CAT TGA AAA G          |
| fliD(339-467)-F    | GCT ATA TGG ATC CGG AAA ACC TGT ATT TTC AGG<br>GCA AAA CAA TGG CGG AAA TTG GCA TC         |
| fliD(401-467)-F    | GCT ATA TGG ATC CGG AAA ACC TGT ATT TTC AGG<br>GCG ACG GCA TTA TTG ATA ATG CGC A          |
| fliD(428-467)-F    | GCT ATA TGG ATC CGG AAA ACC TGT ATT TTC AGG<br>GCA GCA TCG ATG AAA CCG TTG CCC            |
| fliT(1-94)-F       | GCT ATA TGG ATC CAT GAC CTC AAC CGT GGA GTT<br>TAT                                        |
| fliT(1-94)-R       | GCT AAT TCT CGA GTC ATC CGA TCA AAC TAC TCA<br>GTT CAT C                                  |
| fliD-Q439R-F       | GCC CGT TAC AAG GCC CGG TTT ACC CAA CTG GAT                                               |
| fliD-Q439R-R       | ATC CAG TTG GGT AAA CCG GGC CTT GTA ACG GGC                                               |
| fliD-L443R-F       | GCC CAG TTT ACC CAA CGG GAT ACC ATG ATG AGT                                               |
| fliD-L443R-R       | ACT CAT CAT GGT ATC CCG TTG GGT AAA CTG GGC                                               |
| pET28a-EGFP-FliD-F | AAA GGA TCC GGC AGC GGC AGC GGC AGC GGC AGC<br>ATG GCT TCA ATT TCA TCA TT                 |
| pET28a-EGFP-FliD-R | AAA AAG CTT ATA AGC TTT GAT ACC GCT CG                                                    |
| EGFP-fliD-FLAG-F   | AAA GTC GAC ATG GTG AGC AAG GGC GAG GA                                                    |
| EGFP-fliD-FLAG-R   | AAA AAG CTT TTA CTT GTC GTC ATC GTC TTT GTA GTC<br>GCC GCT GCC GGA CTT GTT CAT AGC TGT AA |
| fliD-FLAG-F        | AAA GTC GAC ATG GCT TCA ATT TCA TCA TT                                                    |
| fliD-FLAG-R        | AAA AAG CTT TTA CTT GTC GTC ATC GTC TTT GTA GTC<br>GCC GCT GCC GGA CTT GTT CAT AGC TGT AA |

**Table S6. Primers used in qRT-PCR analysis**

| <b>Primers</b> | <b>Sequences (5' to 3')</b>   |
|----------------|-------------------------------|
| qRT-flhC-F1    | ATA TCC AGT TGG CGA TGG AG    |
| qRT-flhC-R1    | TTG CTC CCA GGT CAT AAA CC    |
| qRT-flhD-F1    | ATC GTC CAG GAC AAA GCA TC    |
| qRT-flhD-R1    | TCG TCC ACT TCA TTG AGC AG    |
| qRT-fliA-F1    | CCG CTG AAG GTG TAA TGG AT    |
| qRT-fliA-R1    | GCT GCA CTG CGT AAG TGG TA    |
| qRT-fliZ-F1    | AAC TGC TCG ACC GCA TTA CG    |
| qRT-fliZ-R1    | AGT GCA AAT CGC CGC AAA       |
| qRT-fliI-F1    | TGC GTC GTT ATG GAC GTT TA    |
| qRT-fliI-R1    | CTT CCA GCG GCA TTA GAA AC    |
| qRT-fliJ-F1    | CGC TGG ATC AAC TAT CAG CA    |
| qRT-fliJ-R1    | GTC GGT CCT GTA AGG TTT GC    |
| qRT-fliM-F1    | GGA TAT TAC CGT GGG TGC CAT A |
| qRT-fliM-R1    | GCT TCA GGT GGA TCA GGT TCA   |
| qRT-fliT-F1    | ACG GTG ATG GAA AAG CAA AC    |
| qRT-fliT-R1    | CTG GCA CGA GTA ACA TAC CG    |
| qRT-fliC-F1    | TGA CAG CAG CAG GTG TTA CC    |
| qRT-fliC-R1    | CGC CAC CCA GTT TGT TTA GT    |
| qRT-fljB-F1    | GCC AAC GAC GGT GAA ACT AT    |
| qRT-fljB-R1    | TGC ATC ATC AAG ACC CGA TA    |
| qRT-fliD-F1    | CCG TGA CGG TAA CGA AAG AT    |
| qRT-fliD-R1    | CCC GGT CTG GAT AGT ACG AA    |
| qRT-gyrB-F1    | ATA ACG CCA CGC AGA AAA TGA   |
| qRT-gyrB-R1    | TGG CTG ATA CAC CAG CTC TTT G |



## Reference

1. Lucas, R. L. & Lee, C. A. Unravelling the mysteries of virulence gene regulation in *Salmonella typhimurium*. *Mol. Microbiol.* **36**, 1024-1033 (2000).
2. Woodcock, D. M. *et al.* Quantitative evaluation of *Escherichia coli* host strains for tolerance to cytosine methylation in plasmid and phage recombinants. *Nucleic Acids Res.* **17**, 3469-3478 (1989).
3. Datsenko, K. A. & Wanner, B. L. One-step inactivation of chromosomal genes in *Escherichia coli* K-12 using PCR products. *Proc. Natl. Acad. Sci. USA* **97**, 6640-6645 (2000).
4. Chang, A. C. & Cohen, S. N. Construction and characterization of amplifiable multicopy DNA cloning vehicles derived from the P15A cryptic miniplasmid. *J. Bacteriol.* **134**, 1141-1156 (1978).
5. Soncini, F. C., Vescovi, E. G. & Groisman, E. A. Transcriptional autoregulation of the *Salmonella typhimurium* *phoPQ* operon. *J. Bacteriol.* **177**, 4364-4371 (1995).
6. Kong, M. *et al.* A novel and highly specific phage endolysin cell wall binding domain for detection of *Bacillus cereus*. *Eur. Biophys. J.* **44**, 437-446 (2015).
